# Supplementary material for: Evolutionary adaptation after crippling cell polarization follows reproducible trajectories
Source: eLife. 2015 Oct 1;4:e09638. doi: 10.7554/eLife.09638 (PMC4630673; doi:10.7554/eLife.09638)
Supplement: Supplementary file 1. — Mutations in the evolved lines. DOI: http://dx.doi.org/10.7554/eLife.09638.018 [file elife09638s001.xlsx]

## Sheet: bem1D lines
line	gene	Multi hit gene in other evolutionary studies		reads	%	SNP/InDel	change	base		AA change	role (from SGD, http://www.yeastgenome.org/)
A1	ERV29	no		58	100	forward SNP	G->T	536	early stop		Protein localized to COPII-coated vesicles; involved in vesicle formation and incorporation of specific secretory cargo; protein abundance increases in response to DNA replication stress
	BEM3	no		75	100	forward SNP	G->A	184	early stop		Rho GTPase activating protein (RhoGAP); involved in control of the cytoskeleton organization; targets the essential Rho-GTPase Cdc42p, which controls establishment and maintenance of cell polarity, including bud-site assembly
	PKH3	no		66	100	forward SNP	T->A	794	AA change	pkh3-L264H	Protein kinase with similarity to mammalian PDK1 and yeast Pkh1p/Phk2p; yeast Pkh1p and Pkh2p are two redundant upstream activators of Pkc1p; identified as a multicopy suppressor of a pkh1 pkh2 double mutant
	NRP1	no		51	100	forward SNP	G->T	1100	early stop		Putative RNA binding protein of unknown function; localizes to stress granules induced by glucose deprivation; predicted to be involved in ribosome biogenesis
	BEM2	no		72	100	forward SNP	A->C	5633	AA change	bem2- V1878G	Rho GTPase activating protein (RhoGAP); involved in the control of cytoskeleton organization and cellular morphogenesis; required for bud emergence; potential GAP for Rho4p
synonymous mutations: none
A2	BEM3	no		105	100	forward SNP	G->A	184	early stop		Rho GTPase activating protein (RhoGAP); involved in control of the cytoskeleton organization; targets the essential Rho-GTPase Cdc42p, which controls establishment and maintenance of cell polarity, including bud-site assembly
	NRP1	no		134	81	forward SNP	A->T	38	early stop		Putative RNA binding protein of unknown function; localizes to stress granules induced by glucose deprivation; predicted to be involved in ribosome biogenesis
	BEM2	no		149	87	forward SNP	T->G	710	AA change	bem2- H237P	Rho GTPase activating protein (RhoGAP); involved in the control of cytoskeleton organization and cellular morphogenesis; required for bud emergence; potential GAP for Rho4p
	P_LRG1	no		136	78	forward SNP	T->G	-96	Promotor		GTPase-activating protein (GAP); contains Rho1p-specific GAP activity, interacting with activated forms of Rho1p; functions along with Sac7p as a negative regulator of the Pkc1p-mediated cell wall integrity signaling pathway; negative regulator of cell wall 1,3-beta-glucan biosynthesis; required for efficient cell fusion; contains a RhoGAP domain and three Lin-11-Isl1-Mec-3 (LIM) domains
synonymous mutations: none
A4	BEM3	no		131	100	forward SNP	G->A	184	early stop		Rho GTPase activating protein (RhoGAP); involved in control of the cytoskeleton organization; targets the essential Rho-GTPase Cdc42p, which controls establishment and maintenance of cell polarity, including bud-site assembly
	NRP1	no		104	100	forward SNP	G>C	540	early stop		Putative RNA binding protein of unknown function; localizes to stress granules induced by glucose deprivation; predicted to be involved in ribosome biogenesis
	P_SOL4	no		14	93	forward SNP	T->A	-248	Promotor		6-phosphogluconolactonase; protein abundance increases in response to DNA replication stress; SOL4 has a paralog, SOL3, that arose from the whole genome duplication
synonymous mutations: none
A5	We had too low coverage in our whole genome sequencing experiment to convincingly find new mutations, however by manual inspection we confirmed the presence of the BEM3 mutation and found no mutations in BEM2 and NRP1
	BEM3	no
A6	BEM3	no		91	100	forward SNP	G->A	184	early stop		Rho GTPase activating protein (RhoGAP); involved in control of the cytoskeleton organization; targets the essential Rho-GTPase Cdc42p, which controls establishment and maintenance of cell polarity, including bud-site assembly
	YOX1	no		112	100	forward SNP	T->A	594	early stop		Homeobox transcriptional repressor; binds to Mcm1p and to early cell cycle boxes (ECBs) in the promoters of cell cycle-regulated genes expressed in M/G1 phase; expression is cell cycle-regulated; potential Cdc28p substrate; relocalizes from nucleus to cytoplasm upon DNA replication stress; YOX1 has a paralog, YHP1, that arose from the whole genome duplication
	PLC1	no		90	100	forward SNP	T-> C	1612	AA change	plc1-S538P	Phospholipase C; hydrolyzes phosphatidylinositol 4,5-biphosphate (PIP2) to generate the signaling molecules inositol 1,4,5-triphosphate (IP3) and 1,2-diacylglycerol (DAG); involved in regulating many cellular processes; Plc1p and inositol polyphosphates are required for acetyl-CoA homeostasis which regulates global histone acetylation
	P_YKL091C	no		88	93	forward SNP	G->T	-210	Promotor		Putative phosphatidylinositol/phosphatidylcholine transfer protein; possibly involved in lipid metabolism; localizes to the nucleus; contains a CRAL/TRIO domain and binds several lipids in a large-scale study; YKL091C has a paralog, SEC14, that arose from the whole genome duplication
	NRP1	no		102	100	forward SNP	C->A	727	early stop		Putative RNA binding protein of unknown function; localizes to stress granules induced by glucose deprivation; predicted to be involved in ribosome biogenesis
synonymous mutations: none
A7	BEM3	no		87	100	forward SNP	G->A	184	early stop		Rho GTPase activating protein (RhoGAP); involved in control of the cytoskeleton organization; targets the essential Rho-GTPase Cdc42p, which controls establishment and maintenance of cell polarity, including bud-site assembly
	GPR1	no		13	77	forward SNP	C->T	1516	AA change	gpr1- D506N	Plasma membrane G protein coupled receptor (GPCR); interacts with the heterotrimeric G protein alpha subunit, Gpa2p, and with Plc1p; sensor that integrates nutritional signals with the modulation of cell fate via PKA and cAMP synthesis
synonymous mutations: none
A9	BEM3	no		80	100	forward SNP	G->A	184	early stop		Rho GTPase activating protein (RhoGAP); involved in control of the cytoskeleton organization; targets the essential Rho-GTPase Cdc42p, which controls establishment and maintenance of cell polarity, including bud-site assembly
synonymous mutations: none
A10	BEM3	no		105	100	forward SNP	G->A	184	early stop		Rho GTPase activating protein (RhoGAP); involved in control of the cytoskeleton organization; targets the essential Rho-GTPase Cdc42p, which controls establishment and maintenance of cell polarity, including bud-site assembly
	NRP1	no		87	100	forward inDEl	T->-G	26	early stop		Putative RNA binding protein of unknown function; localizes to stress granules induced by glucose deprivation; predicted to be involved in ribosome biogenesis
	P_MPH3	no		35	100	forward SNP	C->T	-677	promotor		Alpha-glucoside permease; transports maltose, maltotriose, alpha-methylglucoside, and turanose; identical to Mph2p; encoded in a subtelomeric position in a region likely to have undergone duplication
synonymous mutations: none
T2	BEM3	no		102	92	forward indel	TTAG->-	831	early stop		Rho GTPase activating protein (RhoGAP); involved in control of the cytoskeleton organization; targets the essential Rho-GTPase Cdc42p, which controls establishment and maintenance of cell polarity, including bud-site assembly
	GPR1	no		41	76	forward InDel	GTTGTTGTT->ATT	1620	early stop		Plasma membrane G protein coupled receptor (GPCR); interacts with the heterotrimeric G protein alpha subunit, Gpa2p, and with Plc1p; sensor that integrates nutritional signals with the modulation of cell fate via PKA and cAMP synthesis
	P_BEM2	no		96	100	forward SNP	T-> C	-127	Promotor		Rho GTPase activating protein (RhoGAP); involved in the control of cytoskeleton organization and cellular morphogenesis; required for bud emergence; potential GAP for Rho4p
synonymous mutations: none
T3	BEM3	no		76	87	forward SNP	G->T	1130	early stop		Rho GTPase activating protein (RhoGAP); involved in control of the cytoskeleton organization; targets the essential Rho-GTPase Cdc42p, which controls establishment and maintenance of cell polarity, including bud-site assembly
	TCB1	no		84	75	forward SNP	T->G	572	AA change	tcb1- E191A	Lipid-binding ER protein involved in ER-plasma membrane tethering; one of 6 proteins (Ist2p, Scs2p, Scs22p, Tcb1p, Tcb2p, Tcb3p) that connect ER to plasma membrane and regulate PI4P levels by controlling access of Sac1p phosphatase to its substrate PI4P in PM; contains 3 calcium and lipid binding domains; non-tagged protein also localizes to mitochondria; C-termini of Tcb1p, Tcb2p and Tcb3p inter…
	IRA1	yes, Kryazhimskiy et al, 2014; Koschwanez et al 2013; Lang et al, 2014; Kvitek and Sherlock 2011		83	67	forward SNP	G->A	449	AA change	ira1-P150L	GTPase-activating protein; negatively regulates RAS by converting it from GTP- to the GDP-bound inactive form, required for reducing cAMP levels under nutrient limiting conditions, mediates membrane association of adenylate cyclase; mutations cause catalase T deficiency, defective glycogen synthesis and defective trehalose accumulation; IRA1 has a paralog, IRA2, that arose from the whole genome d…
	GAL83	no		86	69	forward SNP	A->C	617	AA change	gal83-L206R	One of three possible beta-subunits of the Snf1 kinase complex; allows nuclear localization of the Snf1 kinase complex in the presence of a nonfermentable carbon source; contains glycogen-binding domain; GAL83 has a paralog, SIP2, that arose from the whole genome duplication
synonymous mutations: none

## Sheet: BEM1 lines
		Multi hit gene in other evolutionary studies	reads	%	SNP/InDel	change	base			role
3a_A1	ECM21	yes, Kryazhimskiy et al, 2014	40	95	Forward SNP	A->T	2495	early stop		Protein involved in regulating endocytosis of plasma membrane proteins; identified as a substrate for ubiquitination by Rsp5p and deubiquitination by Ubp2p; promoter contains several Gcn4p binding elements; ECM21 has a paralog, CSR2, that arose from the whole genome duplication
	CAT5	no	20	100	forward SNP	T->C	273	AA change	cat5-I91M	Protein required for ubiquinone (Coenzyme Q) biosynthesis; localizes to the matrix face of the mitochondrial inner membrane in a large complex with ubiquinone biosynthetic enzymes; required for gluconeogenic gene activation
	P_LEO1	no	31	90	forward SNP	G->A	-425	promotor		Component of the Paf1 complex; which associates with RNA polymerase II and is involved in histone methylation; plays a role in regulating Ty1 transposition; involved in transcription elongation as demonstrated by the G-less-based run-on (GLRO) assay
	P_YCL023C	no	37	81	Forward SNP	A->C	-606	promotor		Dubious open reading frame; unlikely to encode a functional protein, based on available experimental and comparative sequence data; partially overlaps verified ORF KCC4
	KCC4	no	37	81	forward SNP	A->C	741	AA change	kcc4-E247D	Protein kinase of the bud neck involved in the septin checkpoint; associates with septin proteins, negatively regulates Swe1p by phosphorylation, shows structural homology to bud neck kinases Gin4p and Hsl1p; KCC4 has a paralog, GIN4, that arose from the whole genome duplication
synonymous mutations: 1 (but this same mutation also lays in P_LEO1)
	UBP1		31	90	forward SNP	G->A	3648	synonymous		Ubiquitin-specific protease; removes ubiquitin from ubiquitinated proteins; controls K63 homeostasis during oxidative stress; deubiquitinates Rsp5p and is required for MVB sorting of membrane proteins; can cleave polyubiquitin and has isopeptidase activity 1 2 3 4 5
3a_A2	ECM21	yes, Kryazhimskiy et al, 2014	49	94	forward SNP	A->T	602	early stop		Protein involved in regulating endocytosis of plasma membrane proteins; identified as a substrate for ubiquitination by Rsp5p and deubiquitination by Ubp2p; promoter contains several Gcn4p binding elements; ECM21 has a paralog, CSR2, that arose from the whole genome duplication
	CRD1	no	116	97	forward SNP	A->C	221	AA Change	crd1-L74W	Cardiolipin synthase; produces cardiolipin, which is a phospholipid of the mitochondrial inner membrane that is required for normal mitochondrial membrane potential and function; required to maintain tubular mitochondrial morphology and functions in mitochondrial fusion; also required for normal vacuolar ion homeostasis
	P_BPL1	no	116	97	forward SNP	A->C	-689	promotor		Biotin:apoprotein ligase; covalently modifies proteins with the addition of biotin, required for acetyl-CoA carboxylase (Acc1p) holoenzyme formation; comparative analysis suggests that a mitochondrially targeted form may result from translation starting at a non-canonical codon upstream of the annotated start codon
synonymous mutations: none
3a_A5	YCR087C-A	no	17	100	Forward InDEl	C->TGG	255	InDel		Dubious open reading frame; unlikely to encode a functional protein, based on available experimental and comparative sequence data; partially overlaps uncharacterized gene YCR087C-A; YCR087W is not an essential gene
synonymous mutations: none
3a_A6	SRP40	no	17	76	forward SNP	A->G	87	SNP		Nucleolar serine-rich protein; role in preribosome assembly or transport; may function as a chaperone of small nucleolar ribonucleoprotein particles (snoRNPs); immunologically and structurally to rat Nopp140
	P_DRE2	no	36	100	Forward indel	G->TCGTCATCGTCA	-557	promotor		Component of the cytosolic Fe-S protein assembly (CIA) machinery; contains an Fe-S cluster that receives electrons from NADPH via the action of Tah18pin an early step in the CIA pathway; ortholog of human Ciapin1; protein abundance increases in response to DNA replication stress
synonymous mutations: none
3a_A10	P_MSG5	no	76	93	forward SNP	T->C	-155	promotor		Dual-specificity protein phosphatase; exists in 2 isoforms; required for maintenance of a low level of signaling through the cell integrity pathway, adaptive response to pheromone; regulates and is regulated by Slt2p; dephosphorylates Fus3p; MSG5 has a paralog, SDP1, that arose from the whole genome duplication
synonymous mutations: none
we had too low coverage of 3aA4 and 3aA8 to find mutations
