# Supplementary figures and images for: Evolutionary adaptation after crippling cell polarization follows reproducible trajectories
Source: eLife journal article supplement (doi:10.7554/elife.09638), 2015-10-01

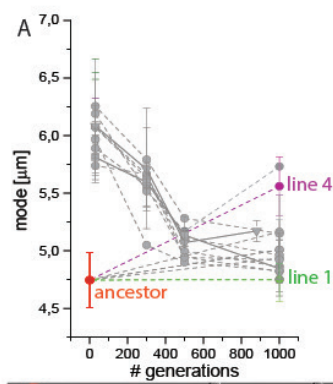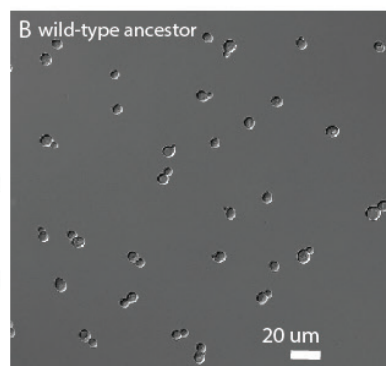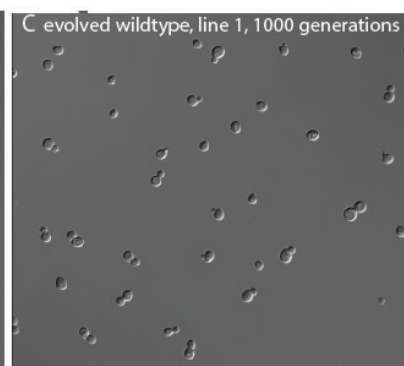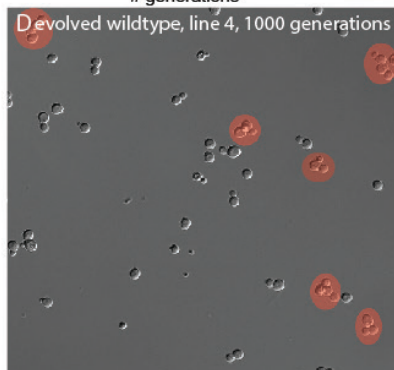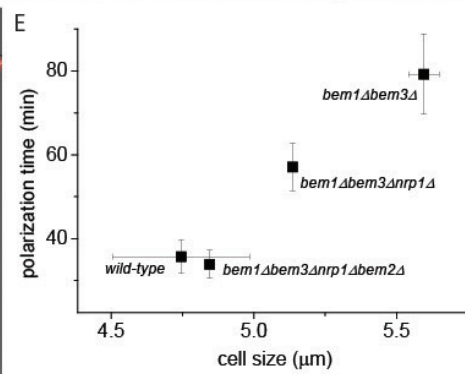

Supplement: supp [file elife-09638-supp-v1.zip]

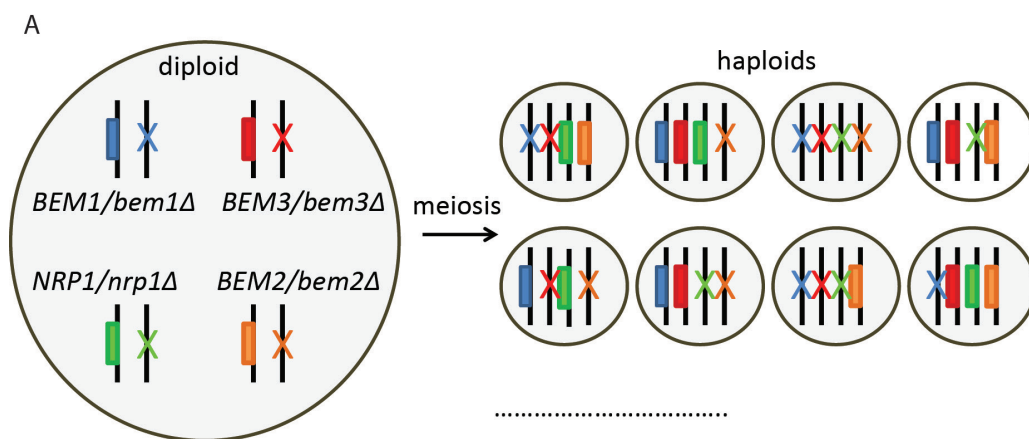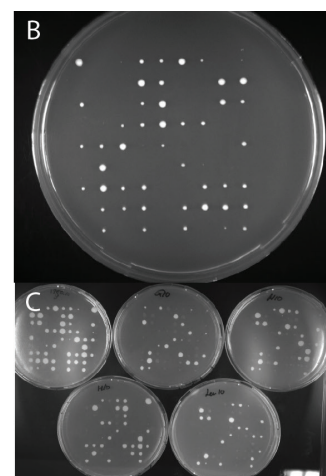

Supplement: supp [file elife-09638-supp-v1.zip]

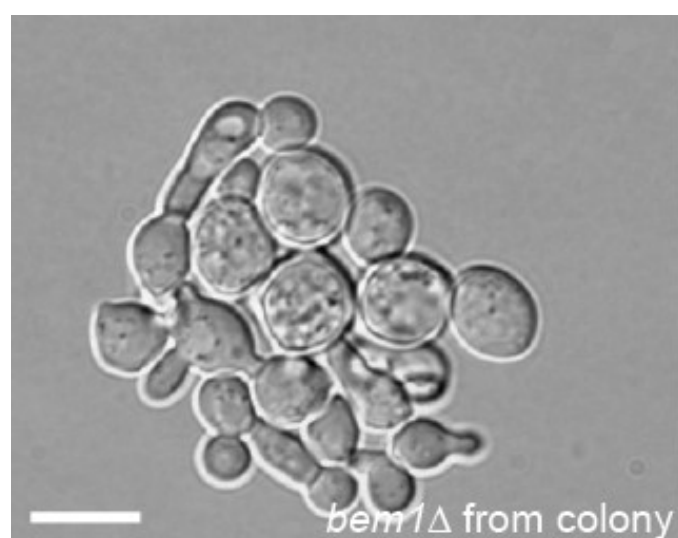

Supplement: supp [file elife-09638-supp-v1.zip]
